# Supplementary material for: Use of a new crosslinking method to obtain semi-IPN membranes with phosphonic acid groups for a PEMFC application
Source: Royal Society of Chemistry journal article supplement (doi:10.1039/c4ta01472c), 2014-01-01
Supplement: c4ta01472c1.pdf [file c4ta01472c1.pdf]

## Electronic Supplementary Information for:

### Use of new cross-linking method to obtain semi-IPN membranes with phosphonic acid groups for a PEMFC application

Etienne Labalme<sup>a</sup>, Ghislain David<sup>a</sup>, Julien Souquet<sup>b</sup>, Pierrick Buvat<sup>b</sup>, Janick Bigarre<sup>b</sup>

Equipe Ingénierie et Architecture Macromoléculaires, Institut Charles Gerhardt UMR CNRS 5253, Ecole Nationale Supérieure de Chimie de Montpellier, 8 rue de l'Ecole Normale, 34296 Montpellier Cedex 5, France

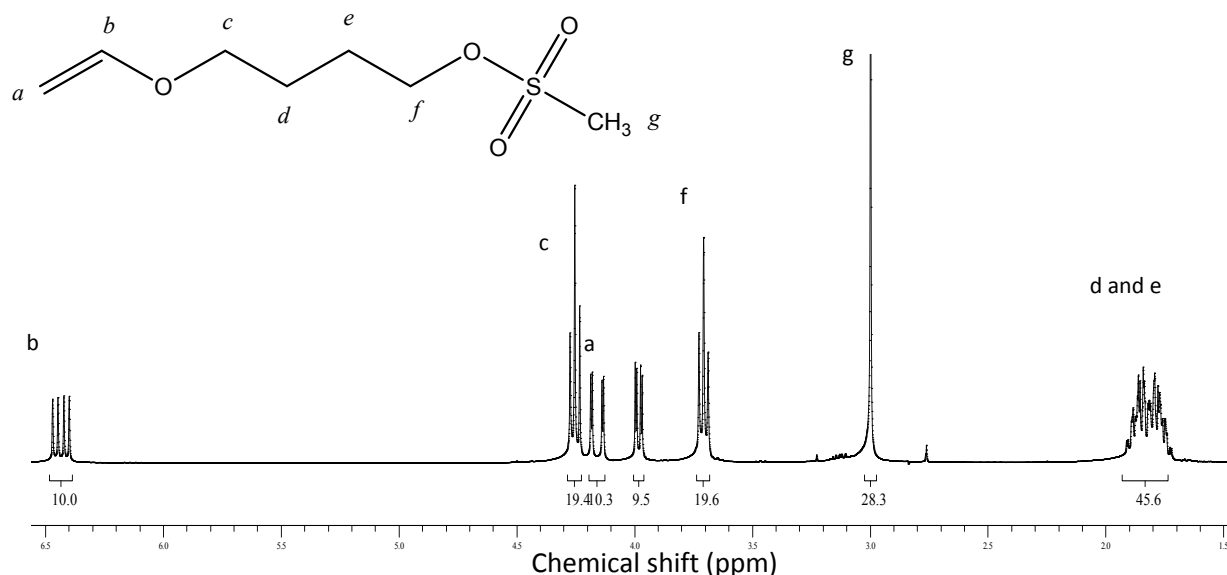

Figure S1 : <sup>1</sup>H NMR spectrum of BVEMs (realized in CDCl<sub>3</sub>)

In Figure S1, after purification, the presence of the signal centered at 3ppm representative of the -CH<sub>3</sub> group (g) of the mesylate function can be observed. In addition, we observe a light shielding of the signal representative of the -CH<sub>2</sub>- group (f) (from 3.8 to 3.7) in α position of the mesylate group due to the delocalization of the electron cloud of oxygen.

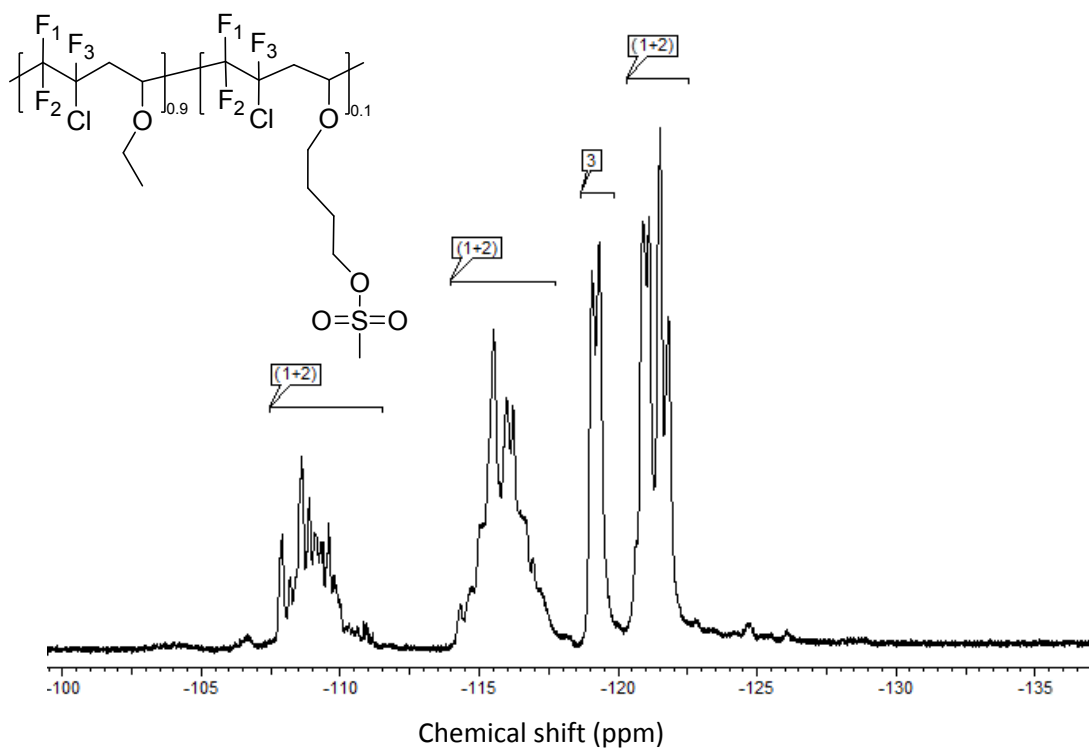

Figure S2:  $^{19}\text{F}$  NMR Spectrum of poly[(CTFE-*alt*-EVE)<sub>0.9</sub>-*co*-(CTFE-*alt*-VBMS)<sub>0.1</sub>] in  $\text{CDCl}_3$

The  $^{19}\text{F}$  NMR (Figure S2) spectrum confirms the waiting structure. Indeed, we can observe the presence of the four signals significant of the fluorine atom of the main polymer chain. Concerning the  $-\text{CF}_2-$  groups, the large signals range between -108 to -112, -115 to -119, and -120.7 to -123 ppm and for the  $-\text{CFCl}-$  the signal is centered at -120 ppm.
